# Supplementary material for: <em>In Silico</em> Phylogenetic and Structural Analysis of Plant Damps
Source: Preprints.org preprint supplement (doi:10.20944/preprints201807.0522.v1), 2018-07-26
Supplement: Supplementary file 1 [file TableS1.docx]

| **Organism** | **Sequence** | **Accession code** |
| --- | --- | --- |
| *Arabidopsis thaliana* | ThaleCress BAM3 | O654401 |
| *Arabidopsis thaliana* | ThaleCress DORN1 | Q9LSR81 |
| *Arabidopsis thaliana* | ThaleCress HMGB1 | O495951 |
| *Arabidopsis thaliana* | ThaleCress HMGB2 | O495961 |
| *Arabidopsis thaliana* | ThaleCress HMGB3 | P930471 |
| *Arabidopsis thaliana* | ThaleCress LYK5 | OAP114902 |
| *Arabidopsis thaliana* | ThaleCress MAPK2 | Q9S7U91 |
| *Arabidopsis thaliana* | ThaleCress MAPK3 | Q390231 |
| *Arabidopsis thaliana* | ThaleCress MAPK6 | Q390261 |
| *Arabidopsis thaliana* | ThaleCress MAPK9 | NP_9743312 |
| *Arabidopsis thaliana* | ThaleCress PEP1 | Q9LV871 |
| *Arabidopsis thaliana* | ThaleCress PEPR1 | Q9SSL91 |
| *Arabidopsis thaliana* | ThaleCress PEPR2 | Q9FZ591 |
| *Arabidopsis thaliana* | ThaleCress SERK3 | Q94F621 |
| *Arabidopsis thaliana* | ThaleCress SERK4 | Q9SKG51 |
| *Arabidopsis thaliana* | ThaleCress SR160 | NP_1956502 |
| *Arabidopsis thaliana* | ThaleCress WAK1 | Q391911 |
| *Arabidopsis thaliana* | ThaleCress WAK2 | Q9LMP11 |
| *Arabidopsis thaliana* | ThaleCress WAK3 | Q9LMN81 |
| *Arabidopsis thaliana* | ThaleCress WAK4 | Q9LMN61 |
| *Arabidopsis thaliana* | ThaleCress WAK5 | Q9LMN71 |
| *Medicago truncatula* | BarrelMedic DORN1 | XP_0134489302 |
| *Medicago truncatula* | BarrelMedic HMGB1/2/3 | XP_0134622962 |
| *Medicago truncatula* | BarrelMedic MAPK3 | XP_0036065092 |
| *Medicago truncatula* | BarrelMedic MAPK6 | G7JNP91 |
| *Medicago truncatula* | BarrelMedic PEPR1/2 | XP_0134656472 |
| *Medicago truncatula* | BarrelMedic SERKL | XP_0035931552 |
| *Medicago truncatula* | BarrelMedic SR160 | XP_0036025042 |
| *Medicago truncatula* | BarrelMedic WAKL | XP_0134613332 |
| *Pisum sativum* | Pea DORN1 | ABU753072 |
| *Pisum sativum* | Pea HMGB1/2/3 | Q410261 |
| *Pisum sativum* | Pea MAPK3 | Q9M6S11 |
| *Pisum sativum* | Pea MAPK6 | Q060601 |
| *Pisum sativum* | Pea NORK | Q8LKZ11 |
| *Pisum sativum* | Pea SR160 | Q76FZ81 |
| *Prunus persica* | Peach DORN1 | XP_0204228992 |
| *Prunus persica* | Peach HMGB1/2/3 | XP_0072027272 |
| *Prunus persica* | Peach MAPK3 | XP_0072053872 |
| *Prunus persica* | Peach MAPK6 | M5VPZ61 |
| *Prunus persica* | Peach PEPR1/2 | XP_0072172862 |
| *Prunus persica* | Peach SERKL | XP_0072017342 |
| *Prunus persica* | Peach SR160 | XP_0072083822 |
| *Prunus persica* | Peach WAKL | ONI112232 |
| *Populus trichocarpa* | Cottonwood DORN1 | XP_0063790222 |
| *Populus trichocarpa* | Cottonwood HMGB1/2/3 | XP_0023069802 |
| *Populus trichocarpa* | Cottonwood MAPK3 | XP_0023140172 |
| *Populus trichocarpa* | Cottonwood MAPK6 | B9HGK01 |
| *Populus trichocarpa* | Cottonwood PEPR1/2 | XP_0023119122 |
| *Populus trichocarpa* | Cottonwood SERKL | XP_0063693402 |
| *Populus trichocarpa* | Cottonwood SR160 | XP_0023106192 |
| *Populus trichocarpa* | Cottonwood WAKL | XP_0063863392 |
| *Vitis vinifera* | WineGrape DORN1 | XP_0022806412 |
| *Vitis vinifera* | WineGrape HMGB1/2/3 | XP_0022800842 |
| *Vitis vinifera* | WineGrape MAPK3 | XP_0022848072 |
| *Vitis vinifera* | WineGrape MAPK6 | F6HAX61 |
| *Vitis vinifera* | WineGrape PEPR1/2 | XP_0022736072 |
| *Vitis vinifera* | WineGrape SERKL | D7STF61 |
| *Vitis vinifera* | WineGrape SR160 | XP_0022789352 |
| *Vitis vinifera* | WineGrape WAKL | XP_0022847002 |
| *Nicotiana tabacum* | Tobacco DORN1 | XP_0164792992 |
| *Nicotiana tabacum* | Tobacco HMGB1/2/3 | XP_0164573422 |
| *Nicotiana tabacum* | Tobacco HSYA | Q93WP81 |
| *Nicotiana tabacum* | Tobacco HSYB | Q93WP71 |
| *Nicotiana tabacum* | Tobacco MAPK3 | XP_0164781772 |
| *Nicotiana tabacum* | Tobacco MAPK6 | O043621 |
| *Nicotiana tabacum* | Tobacco PEPR1/2 | XP_0164362372 |
| *Nicotiana tabacum* | Tobacco SERKL | XP_0164420402 |
| *Nicotiana tabacum* | Tobacco SR160 | NP_0013120722 |
| *Nicotiana tabacum* | Tobacco WAKL | XP_0165001422 |
| *Solanum lycopersicum* | Tomato SR160 | Q8GUQ51 |
| *Solanum lycopersicum* | Tomato DORN1 | XP_0042463542 |
| *Solanum lycopersicum* | Tomato HMGB1/2/3 | XP_0042325652 |
| *Solanum lycopersicum* | Tomato HSY | Q7XAD01 |
| *Solanum lycopersicum* | Tomato MAPK3 | Q84MI41 |
| *Solanum lycopersicum* | Tomato MAPK6 | NP_0012343552 |
| *Solanum lycopersicum* | Tomato PEPR1/2 | XP_0042355112 |
| *Solanum lycopersicum* | Tomato SERKL | NP_0012346262 |
| *Solanum lycopersicum* | Tomato SYST | P270581 |
| *Solanum lycopersicum* | Tomato WAKL | K4DAS1 |
| *Zea mays* | Maize DORN1 | NP_0011460462 |
| *Zea mays* | Maize HMGB1/2/3 | XP_0231575252 |
| *Zea mays* | Maize MAPK3 | NP_0011403082 |
| *Zea mays* | Maize MAPK6 | NP_0011527452 |
| *Zea mays* | Maize WAKL | XP_0086711962 |
| *Zea mays* | Maize PEP1 | A0A0N9ZV661 |
| *Zea mays* | Maize PEPR1/2 | NP_0013077352 |
| *Zea mays* | Maize SERKL | B4G0071 |
| *Zea mays* | Maize SR160 | NP_0013097802 |
| *Oryza sativa* | Rice DORN1 | XP_0156354712 |
| *Oryza sativa* | Rice HMGB1/2/3 | XP_0156512712 |
| *Oryza sativa* | Rice MAPK3 | ABH011892 |
| *Oryza sativa* | Rice MAPK6 | Q84UI51 |
| *Oryza sativa* | Rice PEPR1/2 | XP_0156480662 |
| *Oryza sativa* | Rice SERKL | Q67X311 |
| *Oryza sativa* | Rice SR160 | XP_0156210302 |
| *Oryza sativa* | Rice WAKL | AAL349352 |
| *Hordeum vulgare* | Barley DORN1 | BAJ930922 |
| *Hordeum vulgare* | Barley HMGB1/2/3 | Q434811 |
| *Hordeum vulgare* | Barley MAPK3 | M0V3Q01 |
| *Hordeum vulgare* | Barley MAPK6 | BAJ903512 |
| *Hordeum vulgare* | Barley PEPR1/2 | BAK083222 |
| *Hordeum vulgare* | Barley SERKL | A2TLT11 |
| *Hordeum vulgare* | Barley SR160 | Q76CZ61 |
| *Hordeum vulgare* | Barley WAKL | BAJ974642 |
| *Homo sapiens* | Human HMGB1 | P094291 |
| *Homo sapiens* | Human MAPK3 | P273611 |
| *Homo sapiens* | Human MAPK6 | Q166591 |
| *Gallus gallus* | Chicken MAPK3 | NP_9894812 |
| *Gallus gallus* | Chicken MAPK6 | Q5F3W31 |
| *Danio rerio* | Zebrafish MAPK3 | Q7ZVK81 |
| *Danio rerio* | Zebrafish MAPK6 | Q0H1F21 |

1UniProtKB (https://www.uniprot.org/uniprot/)

2NCBI GenBank (https://www.ncbi.nlm.nih.gov/genbank/)
